# Supplementary material for: In silico and in vitro design of cordycepin encapsulation in liposomes for colon cancer treatment
Source: PubMed Central journal article supplement — RSC Adv. 2021 Feb 25;11(15):8475–84. doi: 10.1039/d1ra00038a (PMC8695206; doi:10.1039/d1ra00038a), 2021-02-25
Supplement: RA-011-D1RA00038A-s001.pdf [file RA-011-D1RA00038A-s001.pdf]

## ***In silico* and *in vitro* design of cordycepin encapsulation in liposomes for colon cancer treatment**

Wasinee Khuntawee<sup>1,2,3a</sup>, Rawiporn Amornloetwattana<sup>1,2,3a</sup>, Wanwipa Vongsangnak<sup>2,4</sup>, Katawut Namdee<sup>5</sup>, Teerapong Yata<sup>6,7</sup>, Mikko Karttunen<sup>8,9,10</sup>, and Jirasak Wong-ekkkabut<sup>1,2,3,\*</sup>

<sup>1</sup>Department of Physics, Faculty of Science, Kasetsart University, Bangkok 10900, Thailand

<sup>2</sup>Computational Biomodelling Laboratory for Agricultural Science and Technology (CBLAST), Faculty of Science, Kasetsart University, Bangkok 10900, Thailand

<sup>3</sup>Thailand Center of Excellence in Physics (ThEP Center), Commission on Higher Education, Bangkok 10400, Thailand

<sup>4</sup>Department of Zoology, Faculty of Science, Kasetsart University, Bangkok 10900, Thailand

<sup>5</sup>National Nanotechnology Centre (NANOTEC), National Science and Technology Development Agency, 111 Thailand Science Park, Paholyothin Rd., Klong Luang, Pathumthani, 12120, Thailand.

<sup>6</sup>Biochemistry Unit, Department of Physiology, Faculty of Veterinary Science, Chulalongkorn University, Bangkok 10330, Thailand.

<sup>7</sup>Natural Products and Nanoparticles Research Unit, Chulalongkorn University, Bangkok 10330, Thailand.

<sup>8</sup>Department of Chemistry, Western University, 1151 Richmond Street, London, Ontario, Canada N6A 3K7

<sup>9</sup>Department of Applied Mathematics, The University of Western Ontario, London, ON, Canada N6A 5B7

<sup>10</sup>The Center for Advanced Materials and Biomaterials Research, The University of Western Ontario, London, ON, Canada N6K 3K7

<sup>a</sup> These authors contributed equally to this work.

\*E-mail addresses: jirasak.w@ku.ac.th

**Table S1:** Bonded interactions of cordycepin and octanol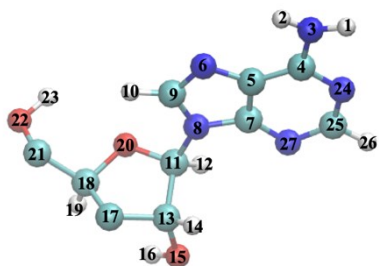

Cordycepin

|    | <u>Atom type</u> | <u>Charge</u> |
|----|------------------|---------------|
| 1  | HS14             | 0.402         |
| 2  | NT               | -0.804        |
| 3  | HS14             | 0.402         |
| 4  | C                | 0.574         |
| 5  | C                | 0.018         |
| 6  | NR               | -0.592        |
| 7  | C                | 0.471         |
| 8  | NT               | -0.168        |
| 9  | C                | 0.224         |
| 10 | HC               | 0.147         |
| 11 | C                | 0.229         |
| 12 | HC               | 0.097         |
| 13 | C                | 0.279         |
| 14 | HC               | 0.091         |
| 15 | OA               | -0.66         |
| 16 | HS14             | 0.434         |
| 17 | CH2r             | -0.096        |
| 18 | C                | 0.029         |
| 19 | HC               | 0.117         |
| 20 | OE               | -0.396        |
| 21 | CH2              | 0.287         |
| 22 | OA               | -0.632        |
| 23 | H                | 0.42          |
| 24 | NR               | -0.751        |
| 25 | C                | 0.59          |
| 26 | HC               | 0.039         |
| 27 | NR               | -0.751        |

**Bond stretching**

| i  | j  | $k_b$<br>(kJmol <sup>-1</sup> nm <sup>-4</sup> ) | $b_0$<br>(nm) |
|----|----|--------------------------------------------------|---------------|
| 1  | 2  | 6.3719e+06                                       | 0.1010        |
| 2  | 3  | 6.3719e+06                                       | 0.1010        |
| 2  | 4  | 3.5143e+06                                       | 0.1360        |
| 4  | 5  | 6.5389e+06                                       | 0.1410        |
| 4  | 24 | 1.0300e+07                                       | 0.1350        |
| 5  | 6  | 8.6600e+06                                       | 0.1390        |
| 5  | 7  | 8.6600e+06                                       | 0.1390        |
| 6  | 9  | 1.2000e+07                                       | 0.1320        |
| 7  | 8  | 1.1000e+07                                       | 0.1380        |
| 7  | 27 | 1.0500e+07                                       | 0.1340        |
| 8  | 9  | 1.1000e+07                                       | 0.1380        |
| 8  | 11 | 8.7100e+06                                       | 0.1470        |
| 9  | 10 | 1.2300e+07                                       | 0.1090        |
| 11 | 12 | 1.2300e+07                                       | 0.1090        |

|    |    |            |        |
|----|----|------------|--------|
| 11 | 13 | 3.0819e+06 | 0.1560 |
| 11 | 20 | 6.5389e+06 | 0.1410 |
| 13 | 14 | 1.2300e+07 | 0.1090 |
| 13 | 15 | 8.1800e+06 | 0.1430 |
| 13 | 17 | 7.1500e+06 | 0.1530 |
| 15 | 16 | 1.9581e+07 | 0.0972 |
| 17 | 18 | 7.1500e+06 | 0.1530 |
| 18 | 19 | 1.2300e+07 | 0.1090 |
| 18 | 20 | 4.6913e+06 | 0.1460 |
| 18 | 21 | 5.4300e+06 | 0.1520 |
| 21 | 22 | 8.1800e+06 | 0.1430 |
| 22 | 23 | 1.9581e+07 | 0.0972 |
| 24 | 25 | 1.0500e+07 | 0.1340 |
| 25 | 26 | 1.2300e+07 | 0.1090 |
| 25 | 27 | 1.0500e+07 | 0.1340 |

---

Angle bending

| i  | j  | k  | $k_{\theta}$<br>(kJmol <sup>-1</sup> rad <sup>-2</sup> ) | $\theta_0$<br>(deg) |
|----|----|----|----------------------------------------------------------|---------------------|
| 5  | 7  | 3  | 465.00                                                   | 108.00              |
| 5  | 7  | 4  | 640.00                                                   | 126.00              |
| 8  | 7  | 4  | 3398.91                                                  | 130.00              |
| 7  | 8  | 5  | 1733.55                                                  | 106.00              |
| 7  | 8  | 24 | 730.00                                                   | 124.00              |
| 9  | 8  | 24 | 730.00                                                   | 124.00              |
| 6  | 9  | 6  | 1559.41                                                  | 114.00              |
| 6  | 9  | 7  | 505.00                                                   | 120.00              |
| 8  | 9  | 7  | 505.00                                                   | 120.00              |
| 8  | 11 | 9  | 1733.55                                                  | 106.00              |
| 8  | 11 | 8  | 610.00                                                   | 115.00              |
| 8  | 11 | 27 | 1680.51                                                  | 109.00              |
| 12 | 11 | 27 | 1680.51                                                  | 109.00              |
| 12 | 11 | 9  | 1680.51                                                  | 109.00              |
| 13 | 11 | 11 | 520.00                                                   | 109.50              |
| 11 | 13 | 11 | 1680.51                                                  | 109.00              |
| 11 | 13 | 8  | 530.00                                                   | 111.00              |
| 11 | 13 | 10 | 2076.33                                                  | 101.00              |
| 14 | 13 | 10 | 1733.55                                                  | 106.00              |
| 14 | 13 | 12 | 545.00                                                   | 113.00              |
| 15 | 13 | 13 | 610.00                                                   | 115.00              |
| 13 | 15 | 20 | 450.00                                                   | 109.50              |
| 13 | 17 | 13 | 2076.33                                                  | 101.00              |
| 17 | 18 | 20 | 532.00                                                   | 111.40              |
| 17 | 18 | 20 | 520.00                                                   | 109.50              |
| 17 | 18 | 14 | 560.00                                                   | 120.00              |
| 19 | 18 | 15 | 507.00                                                   | 107.60              |
| 19 | 18 | 17 | 1680.51                                                  | 109.00              |
| 20 | 18 | 15 | 520.00                                                   | 109.50              |
| 11 | 20 | 17 | 450.00                                                   | 109.50              |
| 18 | 21 | 17 | 530.00                                                   | 111.00              |
| 21 | 22 | 16 | 450.00                                                   | 109.50              |
| 4  | 24 | 18 | 560.00                                                   | 120.00              |
| 24 | 25 | 19 | 505.00                                                   | 120.00              |
| 24 | 25 | 20 | 3398.91                                                  | 130.00              |
| 26 | 25 | 21 | 505.00                                                   | 120.00              |
| 7  | 27 | 20 | 620.00                                                   | 116.00              |

---

Torsions

| i | j | k | l  | $k_{\phi}$<br>(kJmol <sup>-1</sup> rad <sup>-2</sup> ) | $\phi_0$<br>(deg) |
|---|---|---|----|--------------------------------------------------------|-------------------|
| 1 | 2 | 4 | 24 | 5.86                                                   | 180.00            |
| 3 | 2 | 4 | 5  | 5.86                                                   | 180.00            |

|    |    |    |    |       |        |
|----|----|----|----|-------|--------|
| 24 | 4  | 5  | 7  | 41.80 | 180.00 |
| 5  | 4  | 24 | 25 | 41.80 | 180.00 |
| 7  | 5  | 6  | 9  | 41.80 | 180.00 |
| 4  | 5  | 7  | 27 | 41.80 | 180.00 |
| 5  | 6  | 9  | 8  | 41.80 | 180.00 |
| 5  | 7  | 8  | 9  | 41.80 | 180.00 |
| 5  | 7  | 27 | 25 | 41.80 | 180.00 |
| 7  | 8  | 9  | 6  | 41.80 | 180.00 |
| 9  | 8  | 11 | 20 | 3.77  | 0.00   |
| 20 | 11 | 13 | 17 | 1.00  | 180.00 |
| 13 | 11 | 20 | 18 | 1.00  | 180.00 |
| 17 | 13 | 15 | 16 | 1.26  | 0.00   |
| 15 | 13 | 17 | 18 | 5.92  | 0.00   |
| 13 | 17 | 18 | 21 | 5.92  | 0.00   |
| 21 | 18 | 20 | 11 | 1.00  | 180.00 |
| 20 | 18 | 21 | 22 | 5.92  | 0.00   |
| 18 | 21 | 22 | 23 | 1.26  | 0.00   |
| 4  | 24 | 25 | 27 | 41.80 | 180.00 |
| 24 | 25 | 27 | 7  | 41.80 | 180.00 |
| 1  | 2  | 4  | 24 | 5.86  | 180.00 |
| 3  | 2  | 4  | 5  | 5.86  | 180.00 |
| 24 | 4  | 5  | 7  | 41.80 | 180.00 |

Improper

| i  | j  | k  | l  | $k_{\phi}$<br>(kJmol <sup>-1</sup> rad <sup>-2</sup> ) | $\phi_0$<br>(deg) |
|----|----|----|----|--------------------------------------------------------|-------------------|
| 8  | 11 | 9  | 7  | 167.36                                                 | 0.00              |
| 9  | 8  | 6  | 10 | 167.36                                                 | 0.00              |
| 5  | 6  | 4  | 7  | 167.36                                                 | 0.00              |
| 4  | 5  | 2  | 24 | 167.36                                                 | 0.00              |
| 25 | 24 | 27 | 26 | 167.36                                                 | 0.00              |
| 7  | 8  | 5  | 27 | 167.36                                                 | 0.00              |
| 18 | 20 | 21 | 17 | 334.72                                                 | 35.26             |
| 13 | 15 | 17 | 11 | 334.72                                                 | 35.26             |
| 11 | 20 | 13 | 8  | 334.72                                                 | 35.26             |

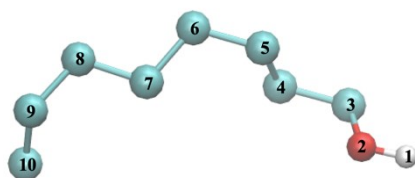

Octanol

|                        | <u>Atom type</u> | <u>Charge</u>                                    |               |  |
|------------------------|------------------|--------------------------------------------------|---------------|--|
| 1                      | HS14             | 0.432                                            |               |  |
| 2                      | OA               | -0.664                                           |               |  |
| 3                      | CH2              | 0.192                                            |               |  |
| 4                      | CH2              | 0.000                                            |               |  |
| 5                      | CH2              | 0.090                                            |               |  |
| 6                      | CH2              | -0.134                                           |               |  |
| 7                      | CH2              | 0.192                                            |               |  |
| 8                      | CH2              | -0.108                                           |               |  |
| 9                      | CH2              | 0.068                                            |               |  |
| 10                     | CH3              | -0.068                                           |               |  |
| <u>Bond stretching</u> |                  |                                                  |               |  |
| i                      | j                | $k_b$<br>(kJmol <sup>-1</sup> nm <sup>-4</sup> ) | $b_0$<br>(nm) |  |
| 1                      | 2                | 1.9581e+07                                       | 0.0972        |  |

|   |    |            |        |
|---|----|------------|--------|
| 2 | 3  | 8.1800e+06 | 0.1430 |
| 3 | 4  | 5.4300e+06 | 0.1520 |
| 4 | 5  | 7.1500e+06 | 0.1530 |
| 5 | 6  | 7.1500e+06 | 0.1530 |
| 6 | 7  | 7.1500e+06 | 0.1530 |
| 7 | 8  | 7.1500e+06 | 0.1530 |
| 8 | 9  | 7.1500e+06 | 0.1530 |
| 9 | 10 | 7.1500e+06 | 0.1530 |

---

| Angle bending |   |    |                                                        |                     |
|---------------|---|----|--------------------------------------------------------|---------------------|
| i             | j | k  | $k_\theta$<br>(kJmol <sup>-1</sup> rad <sup>-2</sup> ) | $\theta_0$<br>(deg) |
| 1             | 2 | 3  | 450.00                                                 | 109.50              |
| 2             | 3 | 4  | 520.00                                                 | 109.50              |
| 3             | 4 | 5  | 530.00                                                 | 111.00              |
| 4             | 5 | 6  | 530.00                                                 | 111.00              |
| 5             | 6 | 7  | 530.00                                                 | 111.00              |
| 6             | 7 | 8  | 530.00                                                 | 111.00              |
| 7             | 8 | 9  | 530.00                                                 | 111.00              |
| 8             | 9 | 10 | 530.00                                                 | 111.00              |

---

| Torsions |   |   |    |                                                      |                   |
|----------|---|---|----|------------------------------------------------------|-------------------|
| i        | j | k | l  | $k_\phi$<br>(kJmol <sup>-1</sup> rad <sup>-2</sup> ) | $\phi_0$<br>(deg) |
| 1        | 2 | 3 | 4  | 1.26                                                 | 0                 |
| 2        | 3 | 4 | 5  | 5.92                                                 | 0                 |
| 3        | 4 | 5 | 6  | 5.92                                                 | 0                 |
| 4        | 5 | 6 | 7  | 5.92                                                 | 0                 |
| 5        | 6 | 7 | 8  | 5.92                                                 | 0                 |
| 6        | 7 | 8 | 9  | 5.92                                                 | 0                 |
| 7        | 8 | 9 | 10 | 5.92                                                 | 0                 |

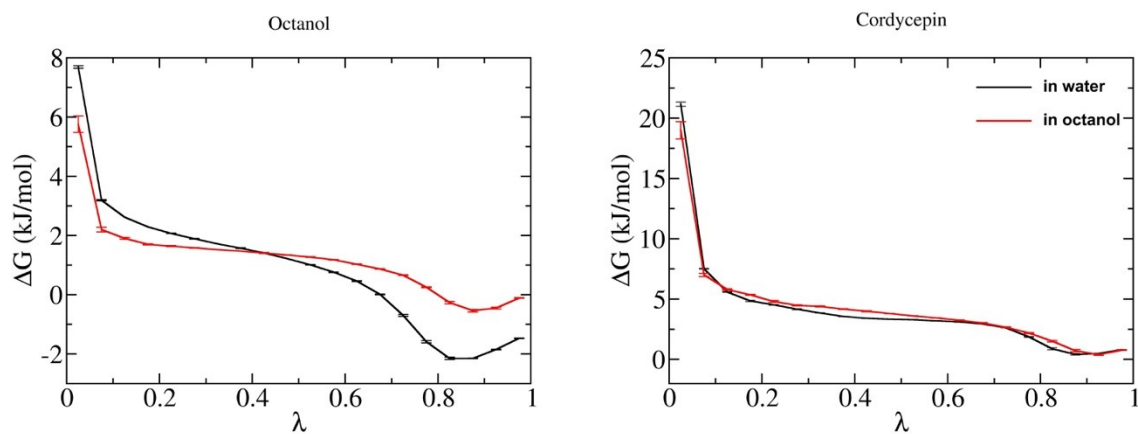

**Fig. S1:** Free energy difference of octanol (left) and cordycepin (right) dissolved in water and octanol, shown in red and black, respectively.

**Table S2:** Solvation free energy and octanol/water partition coefficient compared to experiments.

|                                               |         | Experiment          | TI calculation |
|-----------------------------------------------|---------|---------------------|----------------|
|                                               |         | (kJ/mol)            | (kJ/mol)       |
| Solvation free energy                         |         |                     |                |
| Solute                                        | Solvent |                     |                |
| octanol                                       | water   | -17.11 <sup>1</sup> | -17.09         |
| octanol                                       | octanol | -34.02 <sup>2</sup> | -33.04         |
| Cordycepin                                    | water   | -                   | -75.50         |
| Cordycepin                                    | octanol | -                   | -82.94         |
| Partition coefficient; log(P <sub>o/w</sub> ) |         |                     |                |
| Cordycepin                                    |         | -0.91 <sup>3</sup>  | -1.30          |

**Table S3:** The rate constant ( $K$ ) and half-time ( $t_{1/2}$ ) of the non-encapsulated and encapsulated cordycepin release, the release profiles are fitted to  $y = A \times (1 - e^{-Kx}) + B$ , where  $K$  is the rate

constant. The half-time ( $t_{1/2}$ ) is determined by  $t_{1/2} = \frac{\ln(2)}{K}$ .

| system           | $K$<br>(hour <sup>-1</sup> ) | $t_{1/2}$<br>(hour) |
|------------------|------------------------------|---------------------|
| Non-encapsulated | 4.11±1.67                    | 0.20±0.10           |
| Encapsulated     | 1.42±0.11                    | 0.49±0.04           |

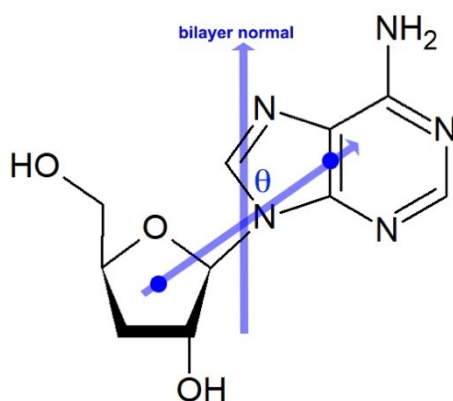

**Fig. S2:** 2D Chemical structure of cordycepin and the definition of the tilt angle ( $\theta$ ). The  $\theta$  angle is characterized by the angle between the vector pointing from the COMs of the deoxyribose ring to the adenine rings and the bilayer normal.

**(a) Biased simulation (free energy calculation)**

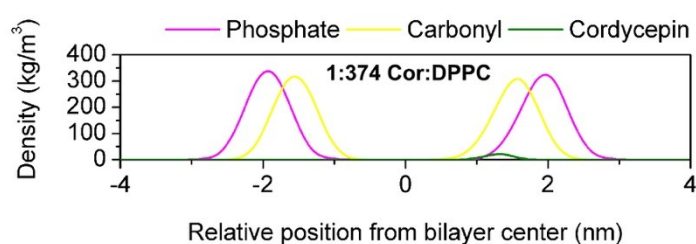

**(b) Unbiased simulation**

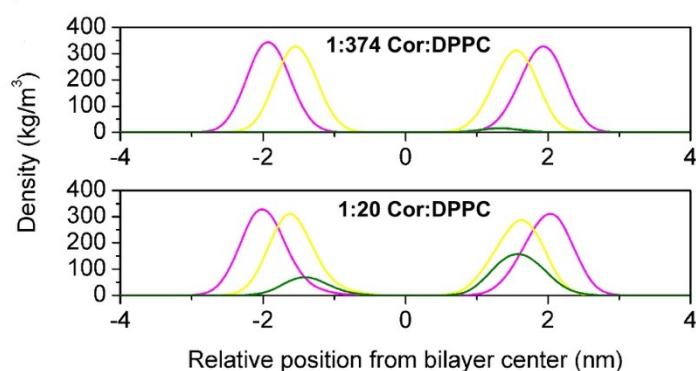

**Fig. S3:** Density profile of cordycepin, DPPC phosphate groups and DPPC carbonyl groups for biased and unbiased simulation systems. Cordycepin preferably located around the DPPC carbonyl groups in all simulations. The locations of cordycepin molecules in biased and unbiased systems at 1:374 Cor:DPPC are consistent.

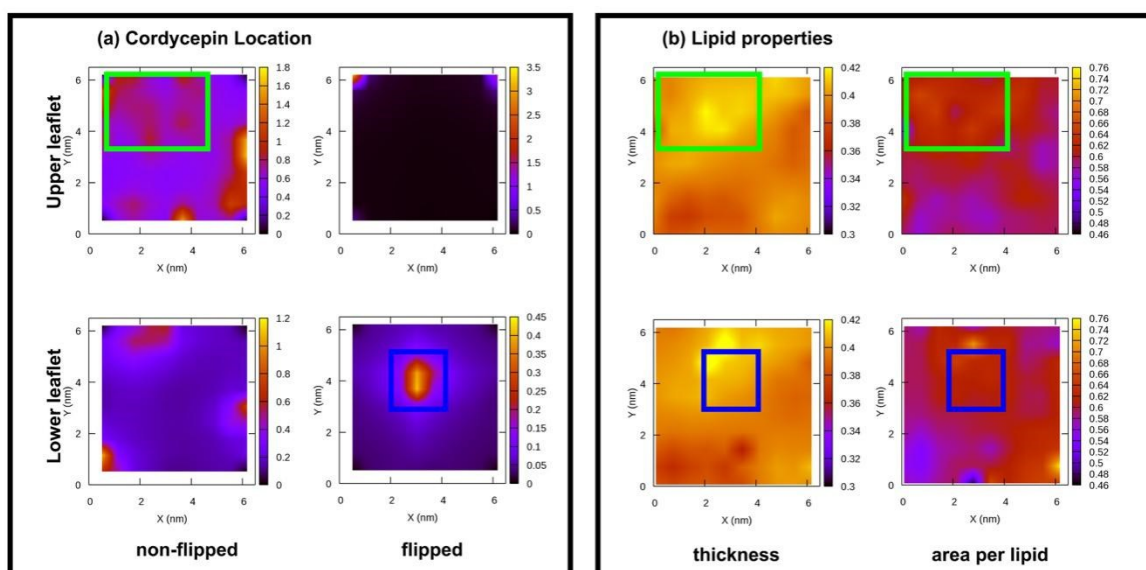

**Fig. S4:** (a) Local density of non-flipped and flipped cordycepin; flipping means turning the sugar ring toward to the bilayer's center. (b) Local lipid bilayer properties *i.e.* thickness and area per lipid in the  $xy$ -plane of the 1:20 Cor:DPPC system at the end of 1  $\mu$ s simulation. The presence of cordycepins (highlighted in green box) resulted in a slight increase in bilayer thickness. No bilayer damage was observed. Rotation of cordycepin did not significantly affect local thickness or area per lipid (highlighted in blue box).



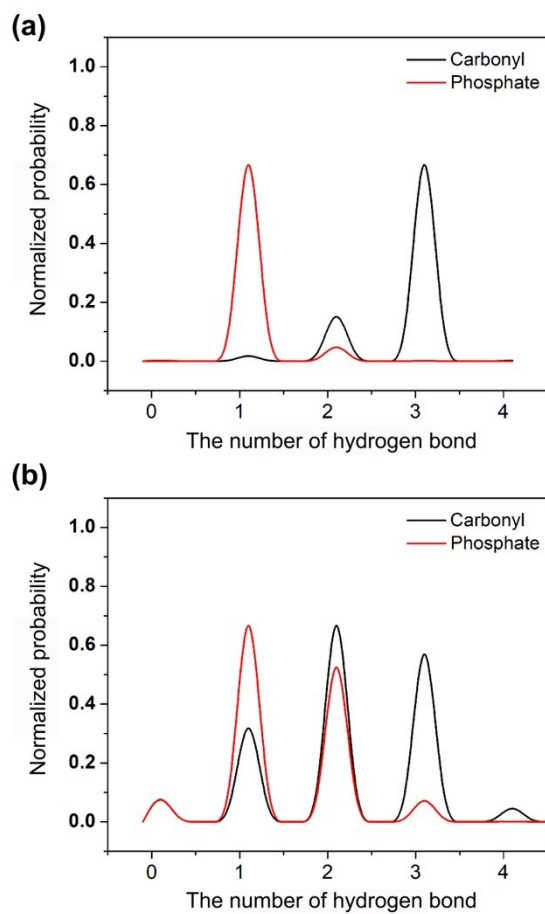

**Fig. S5:** Hydrogen bond probability for cordycepin and lipids' polar groups *i.e.* phosphate and carbonyl groups. The number of hydrogen bond to carbonyls was higher than to the phosphate groups suggesting that binding to the carbonyls is favorable.

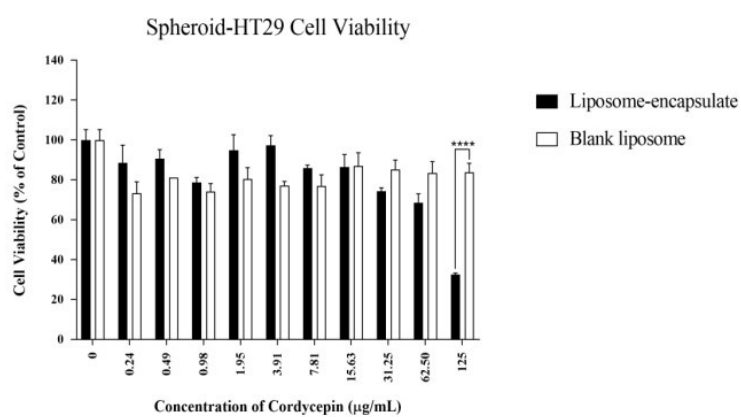

**Fig. S6:** Spheroidal HT-29 cell viability after 48 h treatment by cordycepin-encapsulated liposomes compared to blank liposomes. For statistical analysis, One-way ANOVA with *post hoc* Dunnett's test was performed. \*\*\*\*P<0.0001 was considered as statistically significant.

## References

1. Rizzo, R. C.; Aynechi, T.; Case, D. A.; Kuntz, I. D. Estimation of Absolute Free Energies of Hydration Using Continuum Methods: Accuracy of Partial Charge Models and Optimization of Nonpolar Contributions. *J. Chem. Theory Comput.* **2006**, *2* (1), 128-139.
2. Marenich, A.; Kelly, C.; Thompson, J.; Hawkins, G.; Chambers, C.; Giesen, D.; Winget, P.; Cramer, C.; Truhlar, D. Minnesota Solvation Database–version 2012 2012. *University of Minnesota: Minneapolis, MN.*
3. Maynard, R., The dictionary of substances and their effects. BMJ Publishing Group Ltd: 2000.
